# Supplementary material for: Investigating How the Properties of Electrospun Poly(lactic acid) Fibres Loaded with the Essential Oil Limonene Evolve over Time under Different Storage Conditions
Source: MDPI journal article supplement (doi:10.3390/polym16071005), 2024-04-07
Supplement: s1 [file s1]

# Investigating How the Properties of Electrospun Poly(lactic acid) Fibres Loaded with the Essential Oil Limonene Evolve over Time under Different Storage Conditions

Leah Williams <sup>1,\*</sup>, Fiona L. Hatton <sup>1</sup>, Maria Cristina Righetti <sup>2</sup> and Elisa Mele <sup>1,\*</sup>

<sup>1</sup> Department of Materials, Loughborough University, Loughborough LE11 3TU, UK; f.hatton@lboro.ac.uk

<sup>2</sup> National Research Council-Institute for Chemical and Physical Processes (CNR-IPCF), Via Moruzzi 1, 56124 Pisa, Italy; cristina.righetti@pi.ipcf.cnr.it

\* Correspondence: l.williams@lboro.co.uk (L.W.); e.mele2@lboro.ac.uk (E.M.)

Supplementary materials include representative DSC thermograms for PLA and PLA-Lim fibres, representative tensile testing data (stress-strain curves) and control results associated with the antibacterial studies performed.

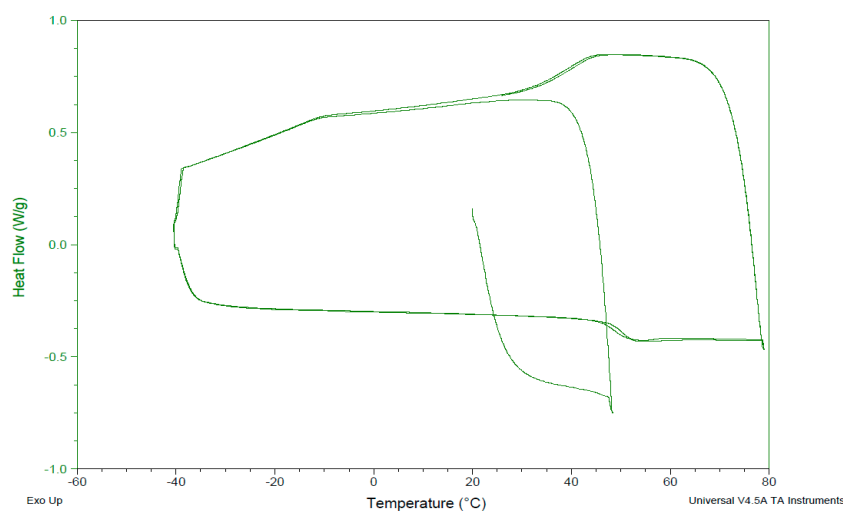

**Figure S1.** Representative differential scanning calorimetry (DSC) thermogram for blank poly(lactic acid) PLA fibres at time = 0.

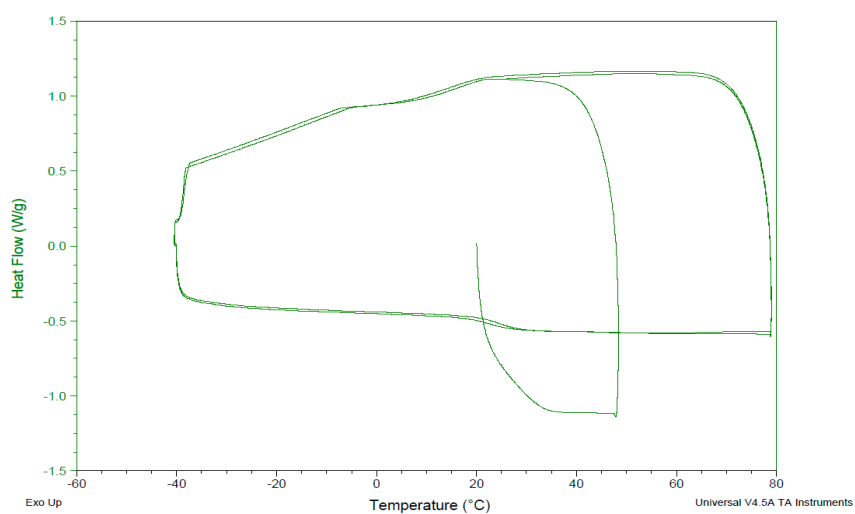

**Figure S2.** Representative differential scanning calorimetry (DSC) thermogram for PLA-limonene fibres at time = 0, stored in open conditions.

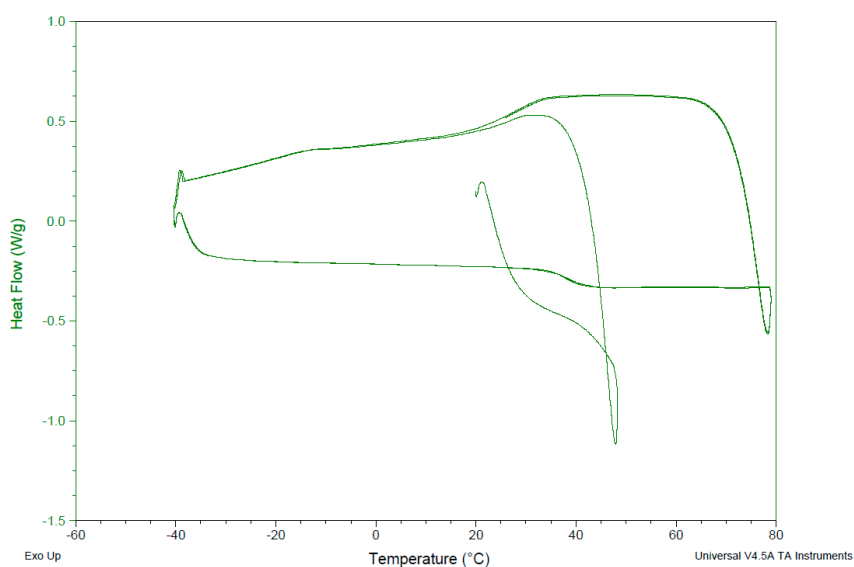

**Figure S3.** Representative differential scanning calorimetry (DSC) thermogram for PLA-limonene fibres at time = 8 weeks, stored in sealed conditions.

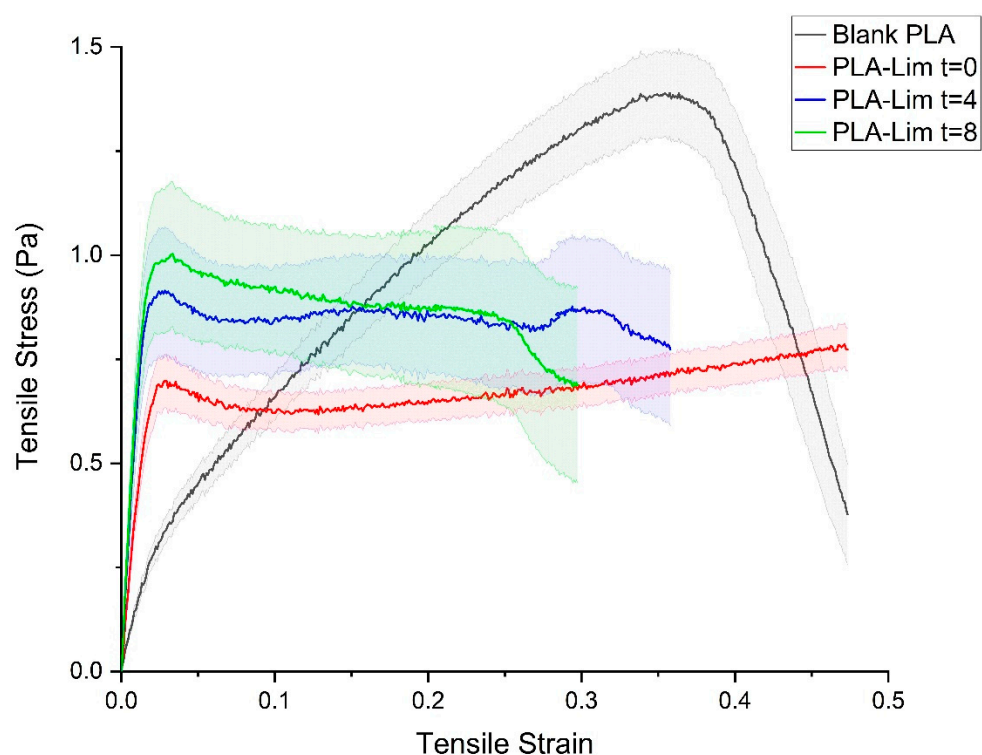

**Figure S4.** Stress-strain graph comparing the failure profiles of blank PLA with PLA-Lim at timepoints 0, 4, and 8 weeks after fibre generation. Each line represents an average from 15 samples, and upper and lower bounds represent the standard error from the average.

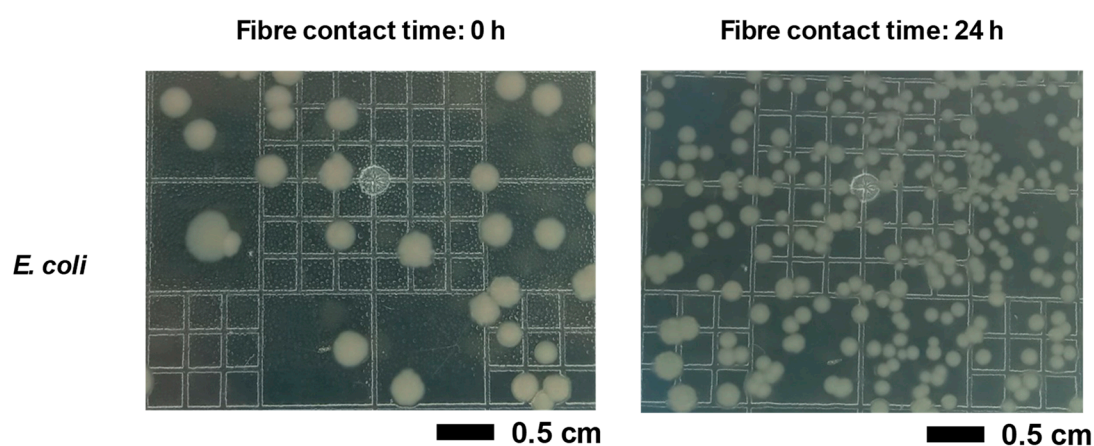

**Figure S5.** Representative control results associated with the antibacterial studies performed. Showing digital photographs of *E. coli* bacterial growth after cultures are exposed to blank PLA electro-spun fibres (no limonene).
